# Supplementary material
Source: publisher figshare collection journal article supplement (https://tandf.figshare.com/ndownloader/files/15606290)
Supplement: Supplementary file 1 [file 15606290]

**Supplementary Table 1** *Cercospora* species used in the Basic Local Alignment Search Tool multiple sequence alignment of the partial calmodulin gene sequence.

| Species | Straina | Location | Host | GenBank accession number |
| --- | --- | --- | --- | --- |
| *C. apii* | CBS 110816; CPC 5111 | USA | *Moluccella laevis* | DQ233397 |
| *C. apii* | CBS 114416; CPC 10925 | Austria | *Apium* sp. | AY840414 |
| *C. apii* | CBS 114418; CPC 10924 | Italy | *A. graveolens* | AY840415 |
| *C. apii* | **CBS 116455; CPC 11556** | Germany | *A. graveolens* | AY840417 |
| *C. apii* | CBS 121.31; CPC 5073 | Austria | *Beta vulgaris* | AY840411 |
| *C. apii* | CBS 127.31; CPC 5119 | Hungary | *B. vulgaris* | AY840412 |
| *C. apii* | CBS 152.52; CPC 5063 | Netherlands | *B. vulgaris* | AY840413 |
| *C. apii* | Ch15-001 | USA | *B. vulgaris var. cicla* | MF681380 |
| *C. apii* | Ch15-002; ICMP 21684 | USA | *B. vulgaris var. cicla* | MF681381 |
| *C. apii* | CPC 18601 | USA | *A. graveolens* | JX142794 |
| *C. apii* | Eu11-11 | United Kingdom | *B. vulgaris* ssp. *vulgaris* | MF681389 |
| *C. beticola* | 108NE | USA | *B. vulgaris* ssp. *vulgaris* | MF681377 |
| *C. beticola* | 14-6 | USA | *B. vulgaris* ssp. *vulgaris* | MF681376 |
| *C. beticola* | C11-10 | USA | *B. vulgaris* ssp. *vulgaris* | MF681379 |
| *C. beticola* | C11-2 | USA | *B. vulgaris* ssp. *vulgaris* | MF681378 |
| *C. beticola* | CBS 113069; CPC 5369 | Botswana | *Spinacia* sp. | DQ233403 |
| *C. beticola* | **CBS 116456; CPC 11557** | Italy | *B. vulgaris* | AY840425 |
| *C. beticola* | CBS 116506; CPC 11581 | Netherlands | *B. vulgaris* | AY840430 |
| *C. beticola* | CBS 117.47 | Czech Republic | *B. vulgaris* | DQ233400 |
| *C. beticola* | CBS 132655; CPC 11341 | South Korea | *Chrysanthemum segetum* | DQ233410 |
| *C. beticola* | CBS 132673; CPC 14617 | Bulgaria | *Goniolimon tataricum* | FJ473438 |
| *C. beticola* | CBS 539.71; CPC 5062 | Romania | *B. vulgaris* | DQ233401 |
| *C. beticola* | Ch15-021 | USA | *B. vulgaris var. cicla* | MF681382 |
| *C. beticola* | Ch15-029; ICMP 21689 | USA | *B. vulgaris var. cicla* | MF681383 |
| *C. beticola* | Ch15-041 | USA | *B. vulgaris var. cicla* | MF681384 |
| *C. beticola* | CPC 10195 | New Zealand | *B. vulgaris* | DQ233408 |
| *C. beticola* | CPC 12031 | Germany | *B. vulgaris* | DQ233417 |
| *C. beticola* | CPC 15623 | Mexico | *B. vulgaris* | JX142817 |
| *C. beticola* | CPC 18813 | USA | *B. vulgaris* | JX142818 |
| *C. beticola* | Eu10-29 | Italy | *B. vulgaris* ssp. *vulgaris* | MF681387 |
| *C. beticola* | Eu11-100 | Germany | *B. vulgaris* ssp. *vulgaris* | MF681390 |
| *C. beticola* | Eu11-156 | Germany | *B. vulgaris* ssp. *vulgaris* | MF681391 |
| *C. beticola* | Eu11-2 | United Kingdom | *B. vulgaris* ssp. *vulgaris* | MF681388 |
| *C. beticola* | Eu11-269 | Sweden | *B. vulgaris* ssp. *vulgaris* | MF681392 |
| *C. beticola* | Eu11-280 | Sweden | *B. vulgaris* ssp. *vulgaris* | MF681393 |
| *C. beticola* | Eu11-289 | Denmark | *B. vulgaris* ssp. *vulgaris* | MF681394 |
| *C. beticola* | Eu7-2 | Italy | *B. vulgaris* ssp. *vulgaris* | MF681385 |
| *C. beticola* | Eu9-36 | Italy | *B. vulgaris* ssp. *vulgaris* | MF681386 |
| *C. beticola* | Tb14-003 | USA | *B. vulgaris* ssp. *vulgaris* | MF681395 |
| *C. beticola* | Tb14-047; ICMP 21690 | USA | *B. vulgaris* ssp. *vulgaris* | MF681396 |
| *C. beticola* | Tb14-070 | USA | *B. vulgaris* ssp. *vulgaris* | MF681397 |
| *C. beticola* | Tb14-075 | USA | *B. vulgaris* ssp. *vulgaris* | MF681398 |
| *C. beticola* | Tb14-078 | USA | *B. vulgaris* ssp. *vulgaris* | MF681399 |
| *C. beticola* | Tb14-080 | USA | *B. vulgaris* ssp. *vulgaris* | MF681400 |
| *C. beticola* | Tb14-081; ICMP 21691 | USA | *B. vulgaris* ssp. *vulgaris* | MF681401 |
| *C. beticola* | Tb14-085; ICMP 21692 | USA | *B. vulgaris* ssp. *vulgaris* | MF681402 |
| *C. beticola* | Tb14-113 | USA | *B. vulgaris* ssp. *vulgaris* | MF681403 |
| *C. beticola* | Tb14-119 | USA | *B. vulgaris* ssp. *vulgaris* | MF681404 |
| *C. beticola* | Tb14-138 | USA | *B. vulgaris* ssp. *vulgaris* | MF681405 |
| *C. beticola* | Tb14-140; ICMP 21693 | USA | *B. vulgaris* ssp. *vulgaris* | MF681406 |
| *C. beticola* | Tb14-146 | USA | *B. vulgaris* ssp. *vulgaris* | MF681407 |
| *C. beticola* | Tb14-153 | USA | *B. vulgaris* ssp. *vulgaris* | MF681408 |
| *C. beticola* | Tb15-032 | USA | *B. vulgaris* ssp. *vulgaris* | MF681413 |
| *C. beticola* | Tb15-035 | USA | *B. vulgaris* ssp. *vulgaris* | MF681414 |
| *C. beticola* | Tb15-043 | USA | *B. vulgaris* ssp. *vulgaris* | MF681418 |
| *C. beticola* | Tb15-044 | USA | *B. vulgaris* ssp. *vulgaris* | MF681419 |
| *C. beticola* | Tb15-054 | USA | *B. vulgaris* ssp. *vulgaris* | MF681421 |
| *C. beticola* | Tb15-056 | USA | *B. vulgaris* ssp. *vulgaris* | MF681422 |
| *C. beticola* | Tb15-057 | USA | *B. vulgaris* ssp. *vulgaris* | MF681423 |
| *C. beticola* | Tb15-060 | USA | *B. vulgaris* ssp. *vulgaris* | MF681424 |
| *C. beticola* | Tb15-072 | USA | *B. vulgaris* ssp. *vulgaris* | MF681425 |
| *C. beticola* | Tb15-080 | USA | *B. vulgaris* ssp. *vulgaris* | MF681426 |
| *C. beticola* | Tb15-101 | USA | *B. vulgaris* ssp. *vulgaris* | MF681427 |
| *C. beticola* | Tb15-103 | USA | *B. vulgaris* ssp. *vulgaris* | MF681428 |
| *C. beticola* | Tb15-105 | USA | *B. vulgaris* ssp. *vulgaris* | MF681429 |
| *C. beticola* | Tb15-108 | USA | *B. vulgaris* ssp. *vulgaris* | MF681430 |
| *C. beticola* | Tb15-133 | USA | *B. vulgaris* ssp. *vulgaris* | MF681431 |
| *C. beticola* | Tb15-146 | USA | *B. vulgaris* ssp. *vulgaris* | MF681433 |
| *C. beticola* | Tb15-171 | USA | *B. vulgaris* ssp. *vulgaris* | MF681437 |
| *C. beticola* | Tb15-174 | USA | *B. vulgaris* ssp. *vulgaris* | MF681439 |
| *C. beticola* | Tb15-177 | USA | *B. vulgaris* ssp. *vulgaris* | MF681440 |
| *C. beticola* | Tb15-178 | USA | *B. vulgaris* ssp. *vulgaris* | MF681441 |
| *C. beticola* | Tb15-179 | USA | *B. vulgaris* ssp. *vulgaris* | MF681442 |
| *C. beticola* | Tb15-182 | USA | *B. vulgaris* ssp. *vulgaris* | MF681443 |
| *C. beticola* | Tb15-202 | USA | *B. vulgaris* ssp. *vulgaris* | MF681446 |
| *C. beticola* | Tb15-207 | USA | *B. vulgaris* ssp. *vulgaris* | MF681447 |
| *C. beticola* | Tb15-208 | USA | *B. vulgaris* ssp. *vulgaris* | MF681448 |
| *C. beticola* | Tb15-211 | USA | *B. vulgaris* ssp. *vulgaris* | MF681449 |
| *C. beticola* | Tb15-215 | USA | *B. vulgaris* ssp. *vulgaris* | MF681450 |
| *C. beticola* | Tb15-218 | USA | *B. vulgaris* ssp. *vulgaris* | MF681451 |
| *C. beticola* | Tb15-220 | USA | *B. vulgaris* ssp. *vulgaris* | MF681452 |
| *C. beticola* | Tb15-241 | USA | *B. vulgaris* ssp. *vulgaris* | MF681453 |
| *C. beticola* | Tb15-259; ICMP 21694 | USA | *B. vulgaris* ssp. *vulgaris* | MF681454 |
| *C. beticola* | Tb15-491 | USA | *B. vulgaris* ssp. *vulgaris* | MF681456 |
| *C. beticola* | Tb15-501 | USA | *B. vulgaris* ssp. *vulgaris* | MF681457 |
| *C. beticola* | Tb15-502 | USA | *B. vulgaris* ssp. *vulgaris* | MF681458 |
| *C. beticola* | Tb15-503 | USA | *B. vulgaris* ssp. *vulgaris* | MF681459 |
| *C. beticola* | Tb15-555 | USA | *B. vulgaris* ssp. *vulgaris* | MF681464 |
| *C. beticola* | Tb15-571 | USA | *B. vulgaris* ssp. *vulgaris* | MF681466 |
| *C. beticola* | Tb15-686 | USA | *B. vulgaris* ssp. *vulgaris* | MF681467 |
| *C. beticola* | Tb15-690 | USA | *B. vulgaris* ssp. *vulgaris* | MF681468 |
| *C. beticola* | Tb15-695 | USA | *B. vulgaris* ssp. *vulgaris* | MF681469 |
| *C. beticola* | Tb16-156 | USA | *B. vulgaris* ssp. *vulgaris* | MF681470 |
| *C. beticola* | Tb16-506 | USA | *B. vulgaris* ssp. *vulgaris* | MF681473 |
| *C. beticola* | TK373 | Turkey | *B. vulgaris* ssp. *vulgaris* | MF681475 |
| *C. beticola* | TK418 | Turkey | *B. vulgaris* ssp. *vulgaris* | MF681476 |
| *C. beticola* | TK80 | Turkey | *B. vulgaris* ssp. *vulgaris* | MF681474 |
| *C. beticola* | WY4-4 | USA | *B. vulgaris* ssp. *vulgaris* | MF681477 |
| *C.* cf. *chenopodii* | CBS 132620 | France | *Chenopodium album* | JX142835 |
| *C.* cf. *chenopodii* | CBS 132677 | Mexico | *Chenopodium* sp. | JX142837 |
| *C.* cf. *chenopodii* | CCTU 1033 | Iran | *Chenopodium album* | KJ885793 |
| *C.* cf. *chenopodii* | CPC 12450 | South Korea | *Chenopodium ficifolium* | JX142838 |
| *C.* cf. *chenopodii* | CPC 15763 | Mexico | *Chenopodium* sp. | JX142839 |
| *C.* cf. *chenopodii* | CPC 15862 | Mexico | *Chenopodium* sp. | JX142841 |
| *C.* cf. *flagellaris* | Arck-05 | USA | *Glycine soja* | KP860272 |
| *C.* cf. *flagellaris* | Arck-07 | USA | *G. soja* | KP860273 |
| *C.* cf. *flagellaris* | CBS 113127 | USA | *Eichhornia crassipes* | DQ835148 |
| *C.* cf. *flagellaris* | CBS 115482; CPC 4410 | South Africa | *Citrus* sp. | DQ835141 |
| *C.* cf. *flagellaris* | CBS 132646; CPC 10681 | South Korea | *Cichorium intybus* | JX142867 |
| *C.* cf. *flagellaris* | CBS 132653; CPC 10884 | South Korea | *Chenopodium ambrosioides* | JX142869 |
| *C.* cf. *flagellaris* | CBS 132667; CPC 11643 | South Korea | *Celosia cristata* | JX142870 |
| *C.* cf. *flagellaris* | CBS 132670; CPC 14487 | South Korea | *Sigesbeckia pubescens* | JX142871 |
| *C.* cf. *flagellaris* | CBS 132674; CPC 14723 | South Korea | *Phytolacca americana* | JX142872 |
| *C.* cf. *flagellaris* | CBS 143.51; CPC 5055 | - | *Bromus* sp. | JX142873 |
| *C.* cf. *flagellaris* | CPC 4411 | South Africa | *Citrus* sp. | DQ835145 |
| *C.* cf. *flagellaris* | Tb15-020; ICMP 21686 | USA | *B. vulgaris* ssp. *vulgaris* | MF681411 |
| *C*. cf. *flagellaris* | Tb15-030 | USA | *B. vulgaris* ssp. *vulgaris* | MF681412 |
| *C.* cf. *flagellaris* | Tb15-037 | USA | *B. vulgaris* ssp. *vulgaris* | MF681415 |
| *C*. cf. *flagellaris* | Tb15-039 | USA | *B. vulgaris* ssp. *vulgaris* | MF681416 |
| *C*. cf. *flagellaris* | Tb15-042 | USA | *B. vulgaris* ssp. *vulgaris* | MF681417 |
| *C.* cf. *flagellaris* | Tb15-045 | USA | *B. vulgaris* ssp. *vulgaris* | MF681420 |
| *C*. cf. *flagellaris* | Tb15-138 | USA | *B. vulgaris* ssp. *vulgaris* | MF681432 |
| *C.* cf. *flagellaris* | Tb15-150 | USA | *B. vulgaris* ssp. *vulgaris* | MF681434 |
| *C*. cf. *flagellaris* | Tb15-152; ICMP 21687 | USA | *B. vulgaris* ssp. *vulgaris* | MF681436 |
| *C*. cf. *flagellaris* | Tb15-172 | USA | *B. vulgaris* ssp. *vulgaris* | MF681438 |
| *C.* cf. *flagellaris* | Tb15-188 | USA | *B. vulgaris* ssp. *vulgaris* | MF681444 |
| *C*. cf. *flagellaris* | Tb15-190 | USA | *B. vulgaris* ssp. *vulgaris* | MF681445 |
| *C.* cf. *flagellaris* | Tb15-478 | USA | *B. vulgaris* ssp. *vulgaris* | MF681455 |
| *C*. cf. *flagellaris* | Tb15-506 | USA | *B. vulgaris* ssp. *vulgaris* | MF681460 |
| *C*. cf. *flagellaris* | Tb15-514 | USA | *B. vulgaris* ssp. *vulgaris* | MF681461 |
| *C*. cf. *flagellaris* | Tb15-530 | USA | *B. vulgaris* ssp. *vulgaris* | MF681462 |
| *C.* cf. *flagellaris* | Tb15-546 | USA | *B. vulgaris* ssp. *vulgaris* | MF681463 |
| *C.* cf. *flagellaris* | Tb15-569 | USA | *B. vulgaris* ssp. *vulgaris* | MF681465 |
| *C.* cf. *flagellaris* | Tb16-178 | USA | *B. vulgaris* ssp. *vulgaris* | MF681472 |
| *C.* cf. *resedae* | CBS 118793 | New Zealand | *Reseda odorata* | JX142906 |
| *C.* cf. *resedae* | CBS 257.67; CPC 5057 | Romania | *Helianthemum* sp. | DQ233395 |
| *C. kikuchii* | **CBS 128.27; CPC 5068** | Japan | *Glycine soja* | DQ835134 |
| *C. kikuchii* | Ck-170 | Brazil | *Glycine soja* | KP825122 |
| *C. kikuchii* | Ck-482 | Brazil | *Glycine soja* | KP825124 |
| *C. nicotianae* | CBS 131.32; CPC 5076 | Indonesia | *Nicotiana tabacum* | DQ835146 |
| *C. nicotianae* | CBS 570.69; CPC 5075 | Nigeria | *Nicotiana tabacum* | DQ835147 |
| *C.* sp. G | CBS 115518; CPC 5360 | New Zealand | *Bidens frondosa* | JX142949 |
| *C.* sp. G | CCTU 1002 | Iran | *Celosia cristata* | KJ885883 |
| *C.* sp. G | CPC 5438 | New Zealand | *Salvia viscosa* | JX142950 |
| *C.* sp. G | Tb15-004; ICMP 21688 | USA | *B. vulgaris* ssp. *vulgaris* | MF681409 |
| *C.* sp. G | Tb15-005 | USA | *B. vulgaris* ssp. *vulgaris* | MF681410 |
| *C.* sp. H | CBS 115205; CPC 5116 | New Zealand | *Dichondra repens* | JX142951 |
| *C.* sp. H | CPC 11620 | Argentina | *Chamelaucium uncinatum* | JX142952 |
| *C.* sp. I | CBS 114815; CPC 5364 | New Zealand | *Deutzia purpurascens* | JX142953 |
| *C.* sp. I | CBS 114816; CPC 5363 | New Zealand | *Deutzia × rosea* | JX142954 |
| *C.* sp. I | CBS 132643; CPC 10138 | South Korea | *Ajuga multiflora* | JX142960 |
| *C. zebrina* | CBS 112723; CPC 3957 | Canada | *Trifolium repens* | JX143012 |
| *C. zebrina* | CBS 112893; CPC 3955 | Canada | *Trifolium pratense* | JX143014 |
| *C. zebrina* | CBS 118789 | Australia | *Trifolium subterraneum* | JX143017 |
| *C. zebrina* | CBS 129.39; CPC 5078 | USA | *T. subterraneum* | JX143020 |
| *C. zebrina* | CBS 137.56; CPC 5118 | Italy | *Hedysarum coronarium* | JX143022 |
| *C. zebrina* | Tb15-151; ICMP 21685 | USA | *B. vulgaris* ssp. *vulgaris* | MF681435 |
| *C. zebrina* | Tb16-177 | USA | *B. vulgaris* ssp. *vulgaris* | MF681471 |
